# Supplementary material for: Interaction between tumour-infiltrating B cells and T cells controls the progression of hepatocellular carcinoma
Source: PubMed Central journal article supplement — Gut. 2015 Dec 15;66(2):342–51. doi: 10.1136/gutjnl-2015-310814 (PMC5284473; doi:10.1136/gutjnl-2015-310814), 2015-12-15
Supplement: gutjnl-2015-310814-s1.pdf [file gutjnl-2015-310814-s1.pdf]

# Supplementary Data

**Supplementary Table 1. Comparison of clinical and demographic characteristics of HCC patients in Singapore, Hong Kong and Zurich cohorts**

| Variables                                           |                                                 | Sg cohort<br>(n=40) | HK cohort<br>(n=45) | Zurich<br>cohort<br>(n=27) | p-value | method |
|-----------------------------------------------------|-------------------------------------------------|---------------------|---------------------|----------------------------|---------|--------|
| <b>Sex, F/M</b>                                     | Number<br>(percent)                             | 6/34(15/85)         | 6/39 (13/87)        | 9/16(33/59)                | =0.0491 | *      |
| <b>*Age, years</b>                                  | Median<br>(Range)                               | 59 (31-84)          | 56 (28-74)          | 60(20-83)                  | ns      | @      |
| <b>Race,<br/>Asian/European</b>                     | Number<br>(percent)                             | 39/0(98/0)          | 45/0(100/0)         | 3/22(11/81)                | <0.0001 | *      |
| <b>Viral status,<br/>Non-infected/HepB<br/>,C,D</b> | Number<br>(percent)                             | 10/29(25/73)        | 3/41(7/91)          | 13/12(48/44)               | =0.0001 | *      |
| <b>Grade, 1+2/ 3+4</b>                              | Number<br>(percent)                             | 22/16 (55/40)       | 44/0 (98/0)         | 16/5(59/19)                | <0.0001 | *      |
| <b>TMN Staging, I/<br/>II+III+IV</b>                | Number<br>(percent)                             | 23/17 (58/42)       | 3/41 (7/91)         | 7/18(26/67)                | <0.0001 | *      |
| <b>α-fetoprotein,<br/>ng/ml</b>                     | Median<br>(Range)                               | 30.3 (1.5-71,000)   | 229(2-468,600)      | 19(1-78171.3)              | =0.03   | @      |
| <b>Tumor size, cm</b>                               | Median<br>(Range)                               | 5(0.7-23)           | 5 .5(2-27)          | 5.2(1.2/18)                | ns      | @      |
| <b>Survival, years</b>                              | Median<br>(25 <sup>th</sup> /75 <sup>th</sup> ) | 4.5 (0.6/5.8)       | 6.3 (3.1/9.2)       | 2.9(1.1/4.7)               | ns      | #      |

%)

@ Kruskal-Wallis test

\* Chi squared test

# Both Cox proportional hazards regression and Kaplan Meier with log-rank test show the differences are not significant.

## Reagents and Antibodies

### Supplementary Table 2: List of antibodies.

The list of antibodies used in immunohistochemistry (IHC) and flow cytometry (FC) was listed in Supplementary table 1 below. The working dilutions are 1:50 for all antibodies.

| Antibody           | Host   | Clone      | Company and location                          | Application |
|--------------------|--------|------------|-----------------------------------------------|-------------|
| CD3                | Mouse  | MIH5       | BD Biosciences, San Jose, CA                  | IHC         |
| CD3                | Rabbit | Polyclonal | Dako, Glostrup, Denmark                       | IHC         |
| CD3                | Goat   | Polyclonal | Santa Cruz Biotechnology, Inc. Dallas, Texas. | IF          |
| CD8                | Mouse  | 1A5        | Novocastra, Newcastle upon Tyne, UK           | IHC         |
| CD20               | Rabbit | BV11       | Novocastra, Newcastle upon Tyne, UK           | IHC/IF      |
| CD20               | Goat   | Polyclonal | Santa Cruz Biotechnology, Inc.                | IF          |
| CD27               | Mouse  | 137B4      | Dako                                          | IHC/IF      |
| CD40               | Mouse  | HB14       | Abcam, Cambridge, MA                          | IHC/IF      |
| CD38               | Rabbit | Polyclonal | Abcam                                         | IHC/IF      |
| CD56               | Mouse  | 123C3      | Monosan                                       | IHC         |
| CD68               | Mouse  | PG-M1      | Dako                                          | IF          |
| CD138              | Mouse  | B-A38      | Abcam                                         | IHC/IF      |
| S100               | Rabbit | Polyclonal | Dako                                          | IF          |
| Granzyme B         | Rabbit | Polyclonal | Abcam                                         | IHC         |
| Activate Caspase 3 | Rabbit | Polyclonal | Promega, Madison, WI                          | IHC         |
| Ki67               | Rabbit | SP6        | AbCam                                         | IHC         |
| CD45               | Mouse  | H130       | BioLegend, San Diego, CA                      | FC          |
| CD19               | Mouse  | SJ25-C1    | Life Technologies, Carlsbad, CA               | FC          |

|            |       |           |                                  |    |
|------------|-------|-----------|----------------------------------|----|
| CD56       | Mouse | NCAM 16.2 | BD Biosciences.                  | FC |
| CD14       | Mouse | 61D3      | eBioscience, Inc., San Diego, CA | FC |
| CD24       | Mouse | ML5       | BioLegend                        | FC |
| CD27       | Mouse | M-T271    | BioLegend                        | FC |
| CD38       | Mouse | HIT2      | BioLegend                        | FC |
| CD40       | Mouse | HB14      | BioLegend                        | FC |
| CD138      | Mouse | DL-101    | BioLegend                        | FC |
| HLA-DR     | Mouse | L243      | eBioscience, Inc.                | FC |
| IFN-gamma  | Mouse | 4S.B3     | BioLegend                        | FC |
| Granzyme B | Mouse | GB11      | BioLegend                        | FC |

**A.**

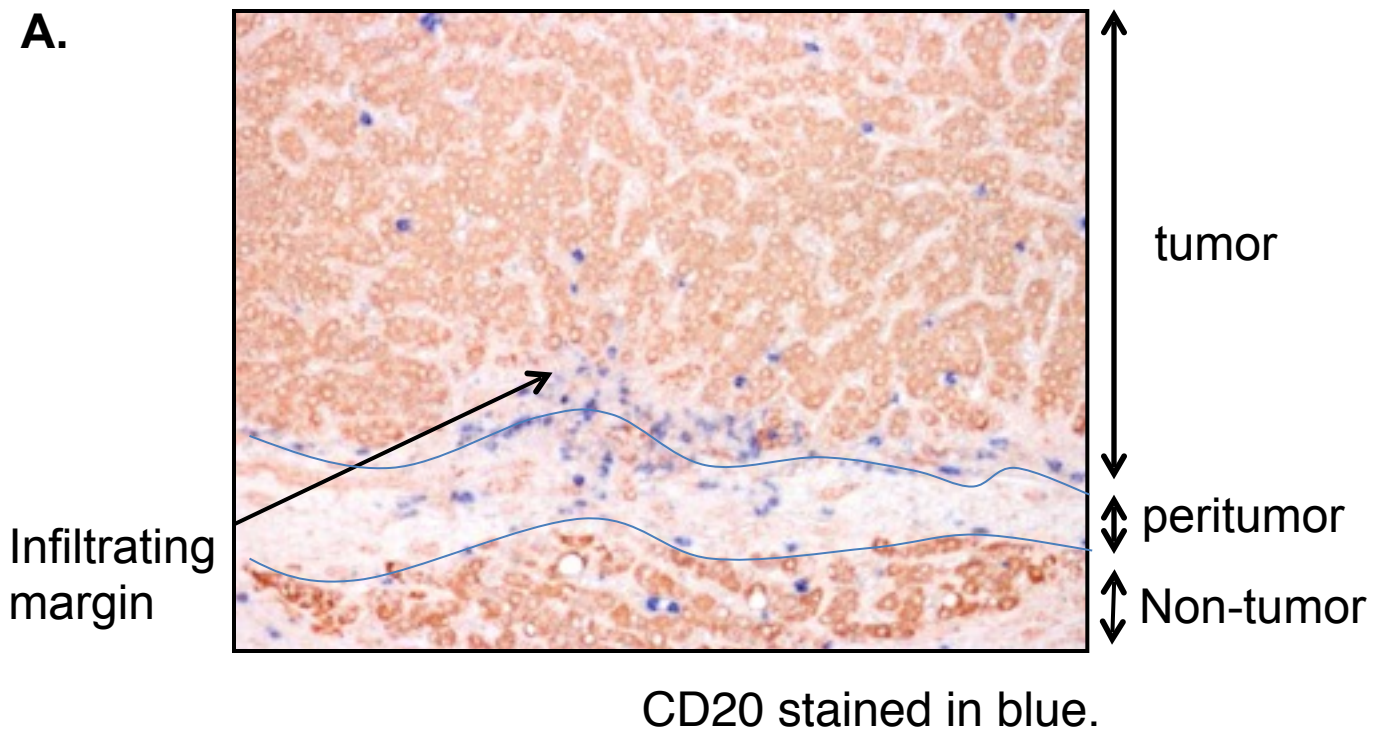

**Supplementary figure 1:**

**A.** Margin definition of tumor region. Representative IHC image of HCC tumor sample at 400x magnification showing the tumor, peritumor and non-tumor regions which marks the basis of our quantification. In blue is CD20 staining on TIB. We considered the immune cells at the infiltrating margin as intratumoral.

**A.****CD20(R)+CD3(B)****CD8(R)+CD20(B)**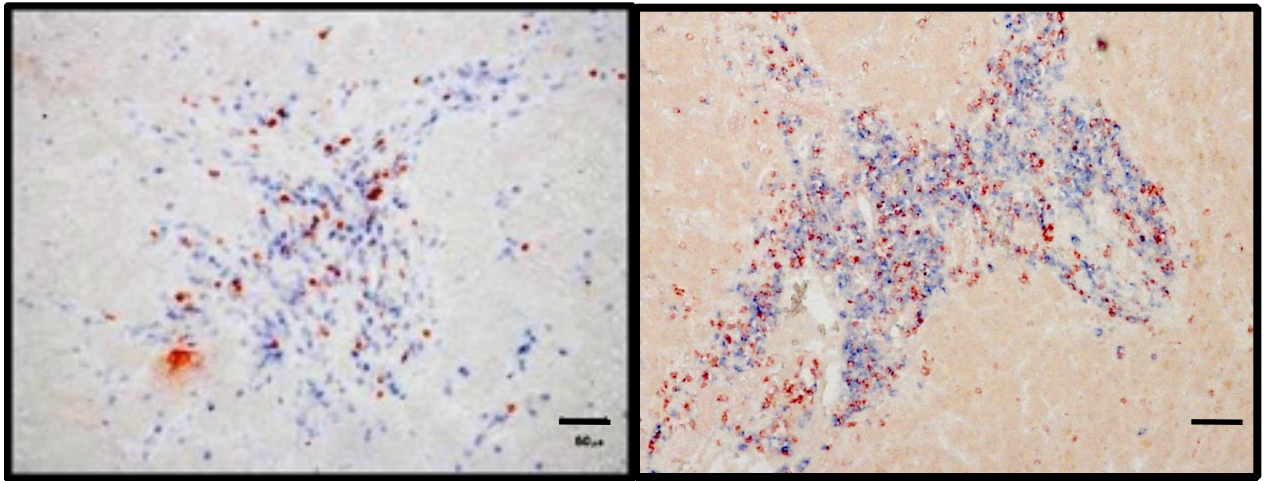**B.**

**CD20<sup>+</sup> B cell  
vs CD56<sup>+</sup> cell**

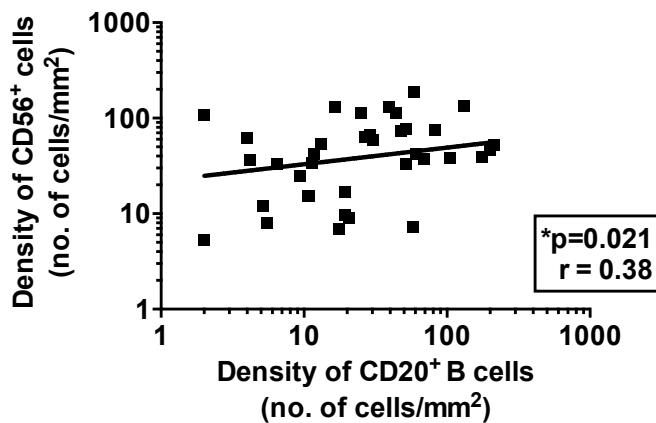

**CD20<sup>+</sup> B cell  
vs CD68<sup>+</sup> cell**

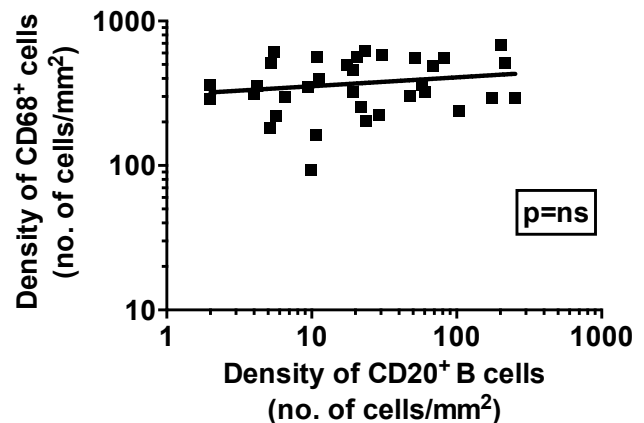

## **Supplementary figure 2: CD20 IHC staining and its correlation to other TIL in HCC samples.**

**A.** Representative IHC images showing staining of CD20, CD3 and CD8 in HCC samples. On the left, CD20 (red) and CD3 (blue) and on the right, CD8 (red) and CD20 (blue). Bar= 50µm. 200x magnification.

**B.** Graphs showing correlation of densities of CD20<sup>+</sup> TIB with CD56<sup>+</sup> NK cells and lack of correlation with CD68<sup>+</sup> macrophages in HCC samples.

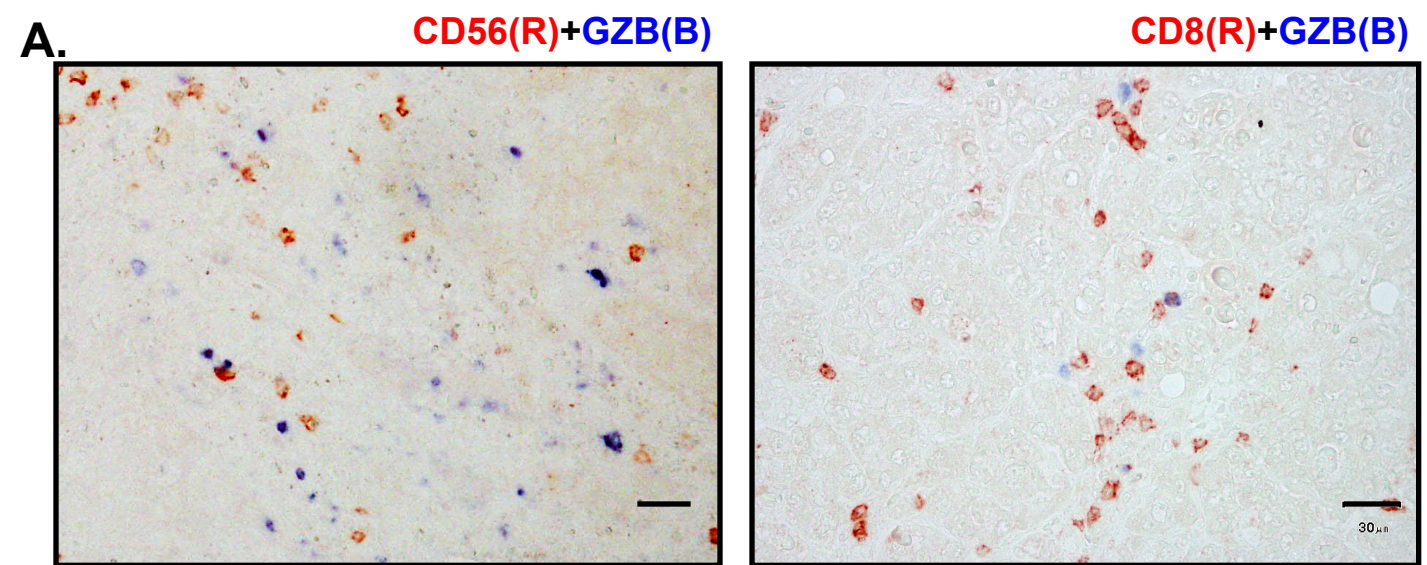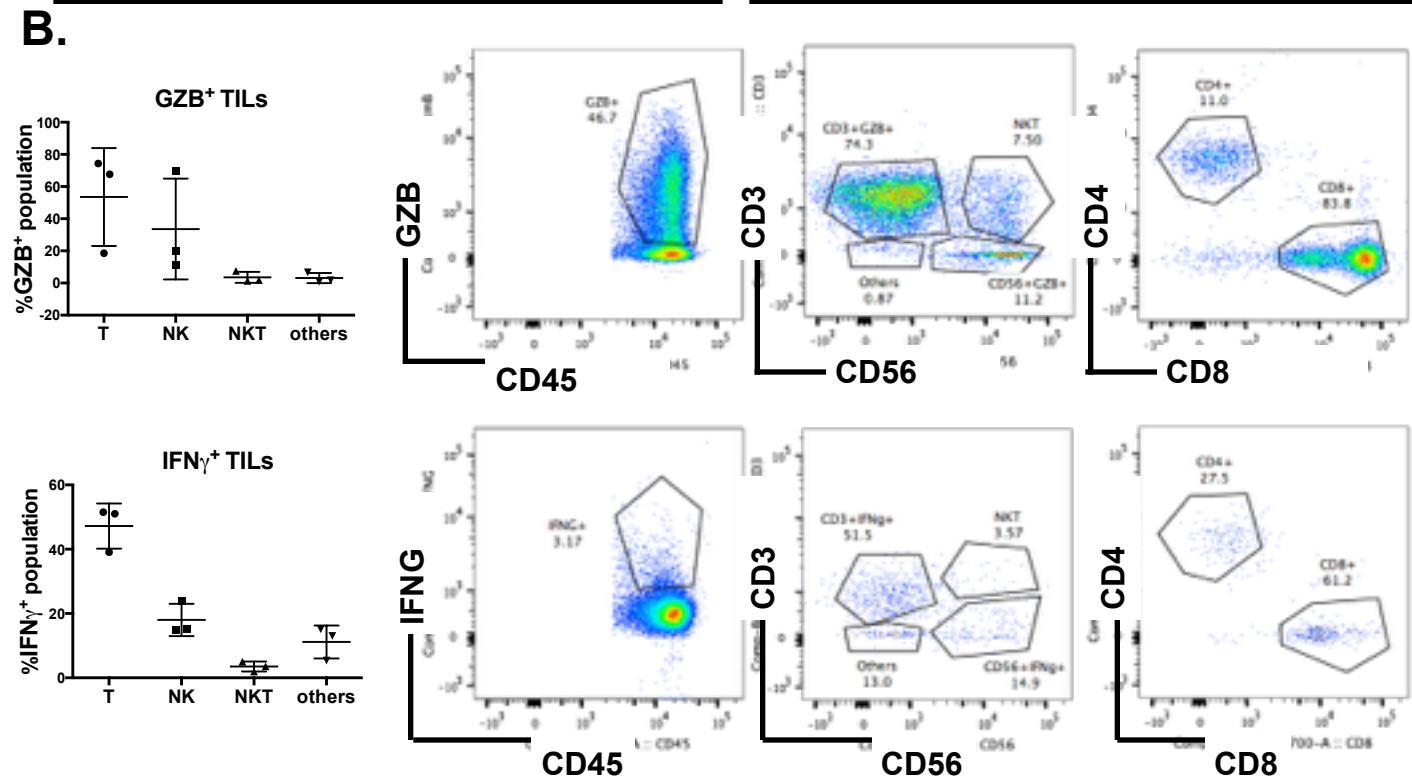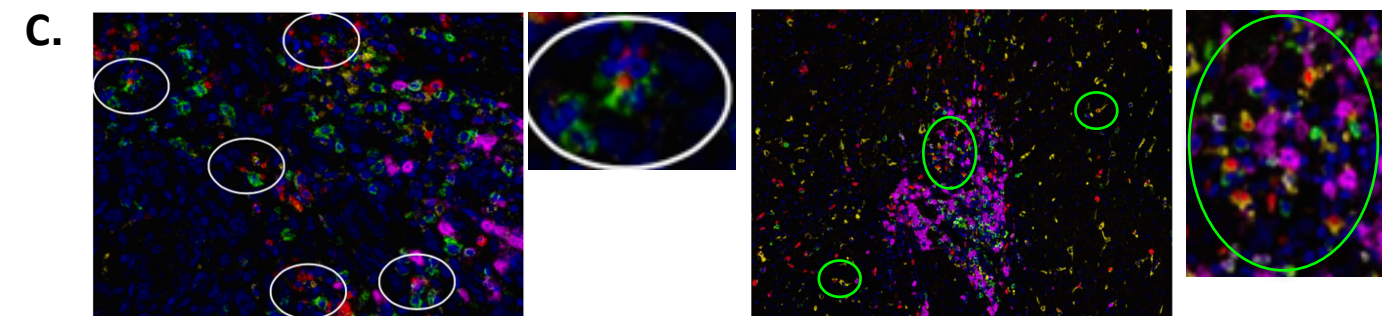

### **Supplementary figure 3: Tumor-infiltrating B cells correlates to T and NK cell activation marker Granzyme B and IFN-gamma.**

**A.** Matched IHC images from serial sections of the same tissue sample from a single HCC patient. CD20(red) was observed to be at close proximity to Granzyme-B (GZB) (blue) in the tumor. CD8(red) and CD56(blue) are seen in the same region with high CD20 staining. Bar= 100 $\mu$ m. 100x magnification.

**B.** Freshly isolated TILs from three HCC patients samples were analyzed using flow cytometry. CD45<sup>+</sup>GranzymeB<sup>+</sup> (above) or IFN $\gamma$ <sup>+</sup> (below) TILs were majority T or NK cells. Graphs on the left, shown mean and SD of three tumor samples from HCC patients. Granzyme B (GZB) expressing TILs are mostly CD3<sup>+</sup> T (53.5 $\pm$ 30.5%) and CD56<sup>+</sup> NK cells (33.6 $\pm$ 31.3%). IFN $\gamma$  expressing TILs are also mostly CD3<sup>+</sup> T (47.2 $\pm$ 7.0%) and CD56<sup>+</sup> NK cells (18.0 $\pm$ 5.0%).

**C.** Representative IF image from HCC tumor region stained using multiplex tissue staining technique with Opal. CD8=Green, CD20=Pink, CD68=Yellow, Granzyme B= Red, DAPI=Blue. Left, circles in white show co-localization of Granzyme (intracellular in Red) with CD8<sup>+</sup> (surface in green) T cells. Right, green circles show co-localization of Granzyme (intracellular in Red) with CD68<sup>+</sup> (surface in yellow) macrophages. Magnified images are presented at the side. Bar= 50 $\mu$ m. 200x magnification.

**A.** **CD20(R)+Caspase 3(B)**

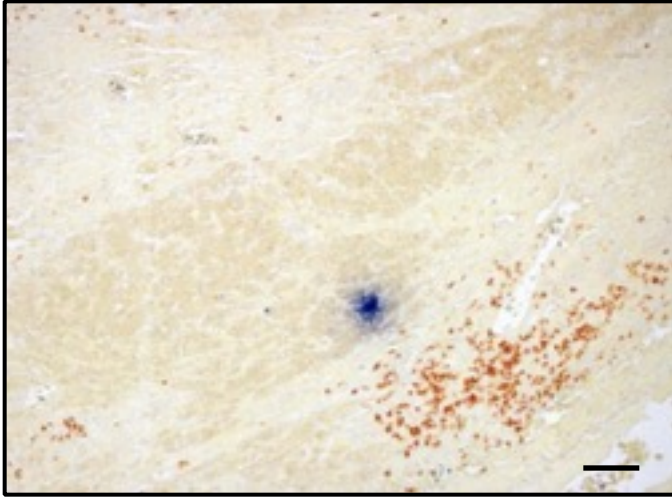

**B.** **CD20(R)+Ki67(B)**

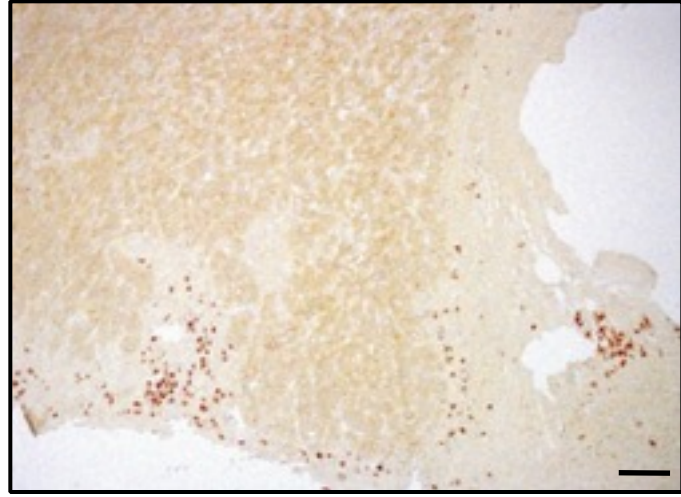

**Supplementary figure 4: Tumor-infiltrating B cells correlates to decreased tumor cell viability.**

**A.** Representative IHC images showing staining of CD20 (red) in close proximity with activated Caspase 3 (blue) and **B.** lack of staining of Ki-67 (blue) in HCC samples. Bar= 100 $\mu$ m. 100x magnification.

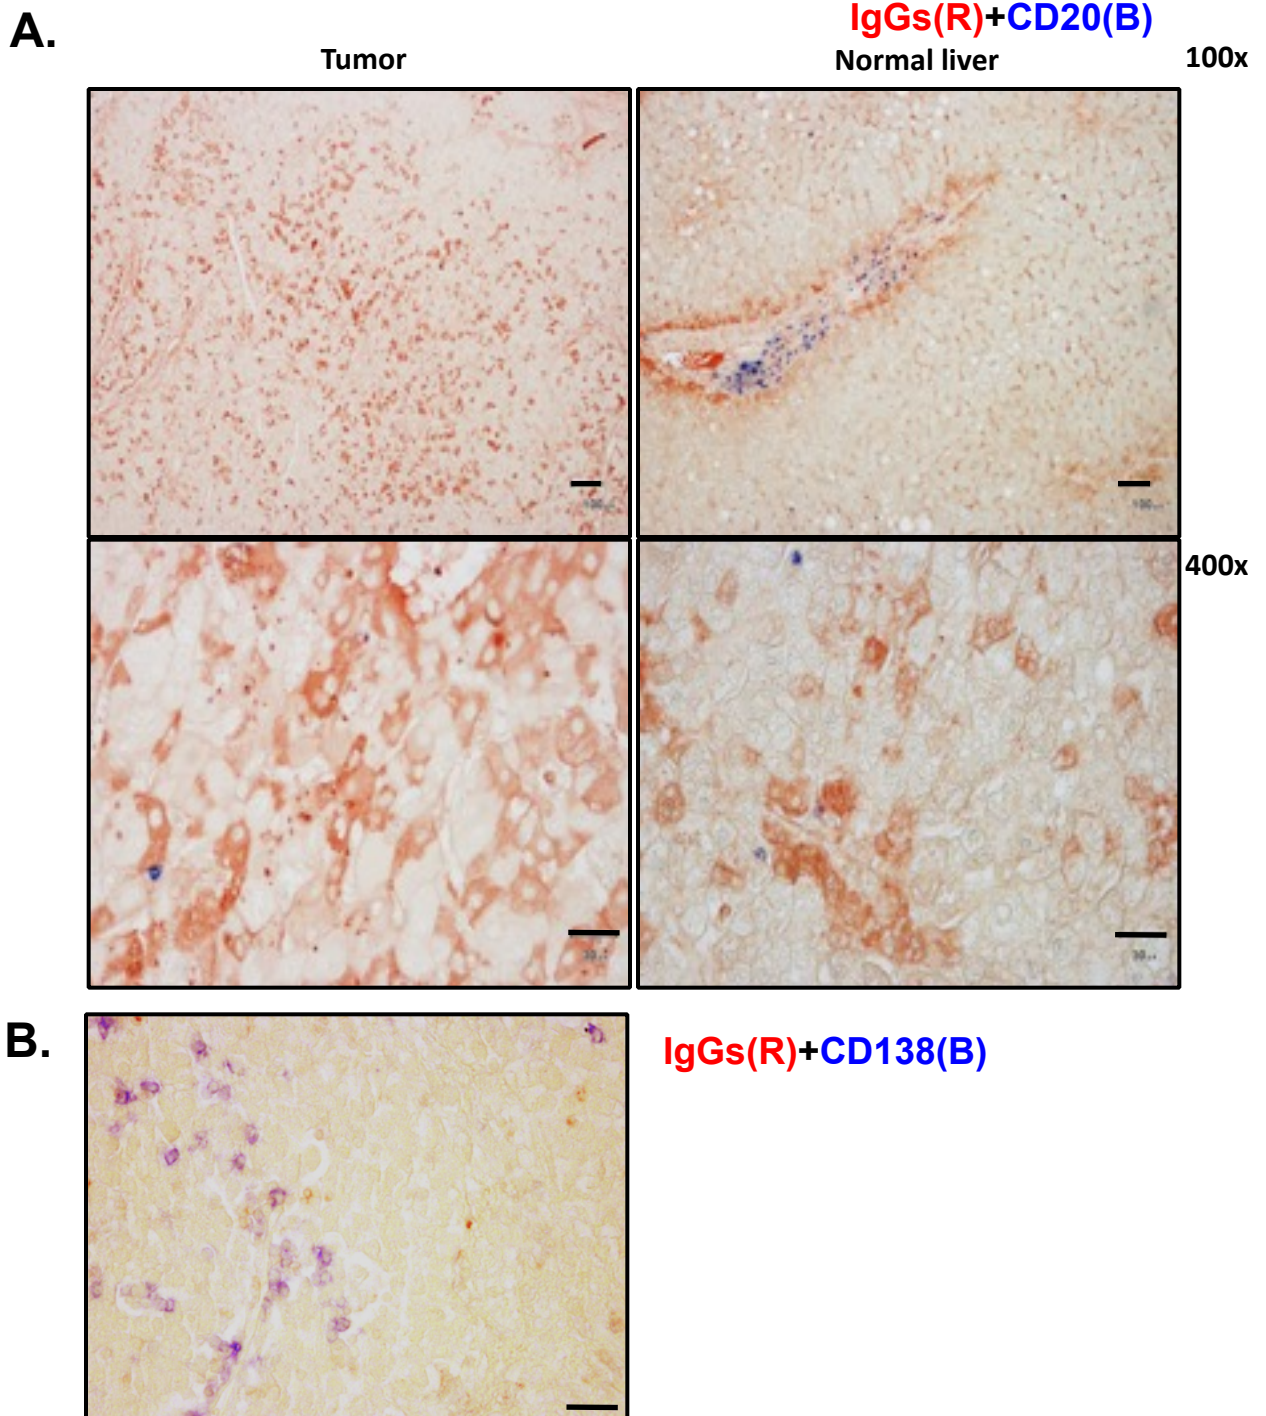

**Supplementary figure 5: Expression of human IgGs in HCC samples.**

**A.** Representative IHC images showing staining of IgGs (red) and CD20 (blue) for tumor (left) or normal liver (right) at 100x magnification (bar=100 $\mu$ m) or 400x magnification (bar= 30 $\mu$ m). **B.** Representative IHC images showing staining of IgGs (red) and CD138 (blue) in tumor. 400x magnification (bar=30 $\mu$ m)
